# Supplementary material for: Risk Analysis of Needle Injury to the Long Thoracic Nerve during Ultrasound-Guided C7 Selective Nerve Root Block
Source: MDPI journal article supplement (doi:10.3390/medicina57060635), 2021-06-19
Supplement: s1 [file s1]

Table S1. The results of the normality test.

| <b>Variable</b>     | <b>N</b> | <b><i>p</i>-Value</b> |
|---------------------|----------|-----------------------|
| Age                 | 20       | 0.004                 |
| Height              | 20       | 0.517                 |
| Weight              | 20       | 0.104                 |
| MCSD of LTN         | 30       | 0.050                 |
| CSA of C7           | 30       | 0.540                 |
| Horizontal distance | 30       | 0.136                 |
| Vertical distance   | 30       | 0.170                 |

*p*-values were calculated by the Shapiro-Wilk test.

Table S2. The normality test results in groups classified according to the risk of injury to the LTN.

|                     | <b>LTN Inside the Risk Zone</b> |                       | <b>LTN Outside the Risk Zone</b> |                       |
|---------------------|---------------------------------|-----------------------|----------------------------------|-----------------------|
|                     | <b>N</b>                        | <b><i>p</i>-Value</b> | <b>N</b>                         | <b><i>p</i>-Value</b> |
| Horizontal distance | 26                              | 0.608                 | 4                                | 0.556                 |
| Vertical distance   | 26                              | 0.250                 | 4                                | 0.561                 |

*p*-values were calculated by the Shapiro-Wilk test.
